# Supplementary material for: Pilot Study of ONCOS-102 and Pembrolizumab: Remodeling of the Tumor Microenvironment and Clinical Outcomes in Anti–PD-1–Resistant Advanced Melanoma
Source: Oxford University Press journal article supplement (doi:10.1158/1078-0432.ccr-22-2046), 2022-09-16
Supplement: ccr-22-2046_supplementary_data_1_suppds1.xlsx [file ccr-22-2046_supplementary_data_1_suppds1.xlsx]

## Sheet: Gene categories
Gene Symbol	Category
ADA	Adaptive immune response
BATF	Adaptive immune response
BLK	Adaptive immune response
CBLB	Adaptive immune response
CCR1	Adaptive immune response
CCR2	Adaptive immune response
CCR4	Adaptive immune response
CCR5	Adaptive immune response
CCR7	Adaptive immune response
CD19	Adaptive immune response
CD1C	Adaptive immune response
CD1D	Adaptive immune response
CD2	Adaptive immune response
CD22	Adaptive immune response
CD247	Adaptive immune response
CD27	Adaptive immune response
CD274	Adaptive immune response
CD38	Adaptive immune response
CD3D	Adaptive immune response
CD3E	Adaptive immune response
CD3G	Adaptive immune response
CD4	Adaptive immune response
CD40LG	Adaptive immune response
CD47	Adaptive immune response
CD5	Adaptive immune response
CD6	Adaptive immune response
CD7	Adaptive immune response
CD79A	Adaptive immune response
CD79B	Adaptive immune response
CD80	Adaptive immune response
CD86	Adaptive immune response
CD8A	Adaptive immune response
CD8B	Adaptive immune response
CRTAM	Adaptive immune response
CTLA4	Adaptive immune response
CX3CL1	Adaptive immune response
CXCL10	Adaptive immune response
CXCL11	Adaptive immune response
CXCL9	Adaptive immune response
CXCR3	Adaptive immune response
CXCR4	Adaptive immune response
DPP4	Adaptive immune response
EBI3	Adaptive immune response
EGR2	Adaptive immune response
EOMES	Adaptive immune response
F2RL1	Adaptive immune response
FAS	Adaptive immune response
FCGR2B	Adaptive immune response
FOXP3	Adaptive immune response
GATA3	Adaptive immune response
GPR18	Adaptive immune response
GRAP2	Adaptive immune response
ICOSLG	Adaptive immune response
ID2	Adaptive immune response
ID3	Adaptive immune response
IDO1	Adaptive immune response
IFNGR1	Adaptive immune response
IGJ	Adaptive immune response
IKZF3	Adaptive immune response
IL11	Adaptive immune response
IL12A	Adaptive immune response
IL12RB1	Adaptive immune response
IL12RB2	Adaptive immune response
IL13RA1	Adaptive immune response
IL13RA2	Adaptive immune response
IL15	Adaptive immune response
IL18	Adaptive immune response
IL18R1	Adaptive immune response
IL18RAP	Adaptive immune response
IL2RB	Adaptive immune response
IL4R	Adaptive immune response
IL7R	Adaptive immune response
IRF1	Adaptive immune response
IRF4	Adaptive immune response
ITGA1	Adaptive immune response
ITK	Adaptive immune response
KLF2	Adaptive immune response
LAG3	Adaptive immune response
LAMP3	Adaptive immune response
LCK	Adaptive immune response
LCP1	Adaptive immune response
M6PR	Adaptive immune response
MAF	Adaptive immune response
MS4A1	Adaptive immune response
NFKBIA	Adaptive immune response
POU2AF1	Adaptive immune response
PSEN1	Adaptive immune response
PSEN2	Adaptive immune response
PTPN6	Adaptive immune response
PTPRC	Adaptive immune response
PTPRCAP	Adaptive immune response
RORC	Adaptive immune response
RPS6	Adaptive immune response
SKAP2	Adaptive immune response
SLC11A1	Adaptive immune response
SOCS1	Adaptive immune response
STAT4	Adaptive immune response
STAT6	Adaptive immune response
TBX21	Adaptive immune response
TIGIT	Adaptive immune response
TNFRSF14	Adaptive immune response
TNFRSF17	Adaptive immune response
TNFSF13B	Adaptive immune response
TNFSF14	Adaptive immune response
ZAP70	Adaptive immune response
B2M	Antigen presenting machinery
CALR	Antigen presenting machinery
CANX	Antigen presenting machinery
CD1C	Antigen presenting machinery
CD1D	Antigen presenting machinery
CD1E	Antigen presenting machinery
CD74	Antigen presenting machinery
CD83	Antigen presenting machinery
CD8A	Antigen presenting machinery
CIITA	Antigen presenting machinery
ERAP1	Antigen presenting machinery
HLA-A	Antigen presenting machinery
HLA-B	Antigen presenting machinery
HLA-C	Antigen presenting machinery
HLA-DMA	Antigen presenting machinery
HLA-DMB	Antigen presenting machinery
HLA-DOA	Antigen presenting machinery
HLA-DOB	Antigen presenting machinery
HLA-DPA1	Antigen presenting machinery
HLA-DPB1	Antigen presenting machinery
HLA-DQA1	Antigen presenting machinery
HLA-DQB1	Antigen presenting machinery
CD74	Antigen presenting machinery
JAK2	Antigen presenting machinery
MR1	Antigen presenting machinery
PDIA3	Antigen presenting machinery
PSMB10	Antigen presenting machinery
PSMB2	Antigen presenting machinery
PSMB7	Antigen presenting machinery
PSMB9	Antigen presenting machinery
TAP1	Antigen presenting machinery
TAP2	Antigen presenting machinery
TAPBP	Antigen presenting machinery
THBS1	Antigen presenting machinery
A2M	Chemokines
C1QBP	Chemokines
CCL11	Chemokines
CCL13	Chemokines
CCL16	Chemokines
CCL17	Chemokines
CCL18	Chemokines
CCL19	Chemokines
CCL2	Chemokines
CCL20	Chemokines
CCL21	Chemokines
CCL22	Chemokines
CCL23	Chemokines
CCL28	Chemokines
CCL3	Chemokines
CCL4	Chemokines
CCL5	Chemokines
CCL8	Chemokines
CCR1	Chemokines
CCR3	Chemokines
CCR4	Chemokines
CCR6	Chemokines
CCR7	Chemokines
CCRL2	Chemokines
CMKLR1	Chemokines
CSF2RB	Chemokines
CX3CL1	Chemokines
CX3CR1	Chemokines
CXCL1	Chemokines
CXCL10	Chemokines
CXCL11	Chemokines
CXCL12	Chemokines
CXCL13	Chemokines
CXCL14	Chemokines
CXCL16	Chemokines
CXCL2	Chemokines
CXCL3	Chemokines
CXCL5	Chemokines
CXCL6	Chemokines
CXCL8	Chemokines
CXCL9	Chemokines
CXCR1	Chemokines
CXCR2	Chemokines
CXCR3	Chemokines
CXCR4	Chemokines
CXCR6	Chemokines
IFI16	Chemokines
IFI27	Chemokines
IFI35	Chemokines
IFIT1	Chemokines
IFIT2	Chemokines
IFNAR2	Chemokines
IL11RA	Chemokines
IL13RA2	Chemokines
IL15RA	Chemokines
IL17RB	Chemokines
IL1B	Chemokines
IL2RG	Chemokines
IL32	Chemokines
IL6ST	Chemokines
ILF3	Chemokines
IRF1	Chemokines
IRF2	Chemokines
IRF8	Chemokines
LTBR	Chemokines
MS4A2	Chemokines
PPBP	Chemokines
PSMB8	Chemokines
STAT1	Chemokines
STAT2	Chemokines
STAT3	Chemokines
STAT4	Chemokines
STAT5B	Chemokines
STAT6	Chemokines
TNFRSF13B	Chemokines
TNFRSF1A	Chemokines
TNFRSF1B	Chemokines
TNFSF12	Chemokines
TNFSF15	Chemokines
TNFSF4	Chemokines
VEGFA	Chemokines
XCL2	Chemokines
XCR1	Chemokines
CCL5	Cytokines
CCR1	Cytokines
CCR2	Cytokines
CCR4	Cytokines
CCR5	Cytokines
CSF1R	Cytokines
CSF2	Cytokines
CSF2RB	Cytokines
CSF3R	Cytokines
CXCL10	Cytokines
CXCL8	Cytokines
EBI3	Cytokines
FLT3LG	Cytokines
FOXP3	Cytokines
HGF	Cytokines
IDO1	Cytokines
IFIT2	Cytokines
IL10	Cytokines
IL10RA	Cytokines
IL11	Cytokines
IL12A	Cytokines
IL12RB2	Cytokines
IL13RA1	Cytokines
IL15	Cytokines
IL16	Cytokines
IL18	Cytokines
IL1B	Cytokines
IL1R2	Cytokines
IL1RN	Cytokines
IL23A	Cytokines
IL2RA	Cytokines
IL2RB	Cytokines
IL32	Cytokines
IL34	Cytokines
IL4R	Cytokines
IL6	Cytokines
IL6R	Cytokines
IL7	Cytokines
IL7R	Cytokines
JAK1	Cytokines
JAK2	Cytokines
JAK3	Cytokines
LTB	Cytokines
NOD2	Cytokines
OAS3	Cytokines
PTGS2	Cytokines
SPP1	Cytokines
STAT5A	Cytokines
TGFB1	Cytokines
TGFB2	Cytokines
TNFSF10	Cytokines
TNFSF14	Cytokines
TNFSF8	Cytokines
TNFSF9	Cytokines
TYK2	Cytokines
VEGFA	Cytokines
GNLY	Cytotoxicity
GZMA	Cytotoxicity
GZMB	Cytotoxicity
GZMH	Cytotoxicity
GZMK	Cytotoxicity
GZMM	Cytotoxicity
PRF1	Cytotoxicity
AIF1	Innate immune response
ALOX15B	Innate immune response
AXL	Innate immune response
BCL6	Innate immune response
BST2	Innate immune response
C1QA	Innate immune response
C1QB	Innate immune response
CA4	Innate immune response
CD14	Innate immune response
CD163	Innate immune response
CD2	Innate immune response
CD209	Innate immune response
CD68	Innate immune response
CIITA	Innate immune response
CMKLR1	Innate immune response
CSF2	Innate immune response
CX3CL1	Innate immune response
CXCL10	Innate immune response
CXCL11	Innate immune response
CXCL13	Innate immune response
CXCL9	Innate immune response
CYBB	Innate immune response
DDX58	Innate immune response
DGAT2	Innate immune response
DMBT1	Innate immune response
EIF2AK2	Innate immune response
FASLG	Innate immune response
FCGR3A	Innate immune response
FCGR3B	Innate immune response
FUT7	Innate immune response
GBP1	Innate immune response
GNLY	Innate immune response
HCK	Innate immune response
HERC6	Innate immune response
ICAM1	Innate immune response
IFI27	Innate immune response
IFI35	Innate immune response
IFI44L	Innate immune response
IFI6	Innate immune response
IFIH1	Innate immune response
IFIT1	Innate immune response
IFIT3	Innate immune response
IFITM1	Innate immune response
IFITM2	Innate immune response
IL12A	Innate immune response
IL1B	Innate immune response
IL23A	Innate immune response
IL3RA	Innate immune response
IRF1	Innate immune response
IRF4	Innate immune response
IRF9	Innate immune response
ISG15	Innate immune response
ISG20	Innate immune response
ITGAL	Innate immune response
ITGAM	Innate immune response
ITGAX	Innate immune response
ITGB7	Innate immune response
KLRB1	Innate immune response
KLRC1	Innate immune response
KLRC2	Innate immune response
KLRD1	Innate immune response
KLRF1	Innate immune response
KLRG1	Innate immune response
KREMEN1	Innate immune response
LCN2	Innate immune response
LRG1	Innate immune response
LST1	Innate immune response
LYZ	Innate immune response
MAPK14	Innate immune response
MIF	Innate immune response
MRC1	Innate immune response
MX1	Innate immune response
NOS2	Innate immune response
NRP1	Innate immune response
OAS1	Innate immune response
OAS2	Innate immune response
OAS3	Innate immune response
PRF1	Innate immune response
PRKCE	Innate immune response
PSMB9	Innate immune response
PYGL	Innate immune response
SBNO2	Innate immune response
SELL	Innate immune response
SH2D1B	Innate immune response
STAT1	Innate immune response
SYK	Innate immune response
TAP1	Innate immune response
TBX21	Innate immune response
THBD	Innate immune response
TICAM1	Innate immune response
TLR3	Innate immune response
TLR7	Innate immune response
VCAM1	Innate immune response
VEGFA	Innate immune response
ZBTB46	Innate immune response
TIGIT	T-cell inflamed response
CD27	T-cell inflamed response
CD8A	T-cell inflamed response
PDCD1LG2	T-cell inflamed response
LAG3	T-cell inflamed response
CD274	T-cell inflamed response
CXCR6	T-cell inflamed response
CMKLR1	T-cell inflamed response
NKG7	T-cell inflamed response
CCL5	T-cell inflamed response
PSMB10	T-cell inflamed response
IDO1	T-cell inflamed response
CXCL9	T-cell inflamed response
HLA-DQA1	T-cell inflamed response
CD276	T-cell inflamed response
STAT1	T-cell inflamed response
HLA-DRB1	T-cell inflamed response
HLA-E	T-cell inflamed response
CASP8	Tumor associated antigens
CDK4	Tumor associated antigens
CEACAM5	Tumor associated antigens
CT83	Tumor associated antigens
CTNNB1	Tumor associated antigens
ERBB2	Tumor associated antigens
MUC1	Tumor associated antigens
TP53	Tumor associated antigens
ARID1A	Release of cancer cell antigens
ATM	Release of cancer cell antigens
BIRC3	Release of cancer cell antigens
BLM	Release of cancer cell antigens
BNIP3	Release of cancer cell antigens
BRCA1	Release of cancer cell antigens
BRCA2	Release of cancer cell antigens
BRD3	Release of cancer cell antigens
BRD4	Release of cancer cell antigens
BRIP1	Release of cancer cell antigens
CCNA1	Release of cancer cell antigens
CCND1	Release of cancer cell antigens
CCNO	Release of cancer cell antigens
DDB2	Release of cancer cell antigens
DNMT1	Release of cancer cell antigens
DTX3L	Release of cancer cell antigens
EIF5AL1	Release of cancer cell antigens
EPM2AIP1	Release of cancer cell antigens
FAM124B	Release of cancer cell antigens
FANCA	Release of cancer cell antigens
FASLG	Release of cancer cell antigens
H2AFX	Release of cancer cell antigens
HDAC11	Release of cancer cell antigens
HDAC3	Release of cancer cell antigens
HDAC4	Release of cancer cell antigens
HDAC5	Release of cancer cell antigens
HELLS	Release of cancer cell antigens
HMGA1	Release of cancer cell antigens
IL10	Release of cancer cell antigens
MAGEA1	Release of cancer cell antigens
MAGEA12	Release of cancer cell antigens
MAGEA6	Release of cancer cell antigens
MAGEA3	Release of cancer cell antigens
MAGEA4	Release of cancer cell antigens
MAGEB2	Release of cancer cell antigens
MAGEC1	Release of cancer cell antigens
MAGEC2	Release of cancer cell antigens
MAP3K12	Release of cancer cell antigens
MGMT	Release of cancer cell antigens
MLH1	Release of cancer cell antigens
MRE11A	Release of cancer cell antigens
MSH2	Release of cancer cell antigens
MSH6	Release of cancer cell antigens
NBN	Release of cancer cell antigens
NEIL1	Release of cancer cell antigens
PARP12	Release of cancer cell antigens
PARP4	Release of cancer cell antigens
PARP9	Release of cancer cell antigens
PIAS4	Release of cancer cell antigens
PIK3CD	Release of cancer cell antigens
PIK3CG	Release of cancer cell antigens
PIK3R5	Release of cancer cell antigens
PMS2	Release of cancer cell antigens
POLD1	Release of cancer cell antigens
PRKX	Release of cancer cell antigens
RAD50	Release of cancer cell antigens
RAD51	Release of cancer cell antigens
RAD51C	Release of cancer cell antigens
RNLS	Release of cancer cell antigens
SFXN1	Release of cancer cell antigens
SMAP1	Release of cancer cell antigens
SOX10	Release of cancer cell antigens
SREBF1	Release of cancer cell antigens
TNFRSF10B	Release of cancer cell antigens
TNFRSF10C	Release of cancer cell antigens
TNFRSF10D	Release of cancer cell antigens
TNFSF10	Release of cancer cell antigens
TNKS	Release of cancer cell antigens
TP53	Release of cancer cell antigens
TTC30A	Release of cancer cell antigens
TYMS	Release of cancer cell antigens
UBA7	Release of cancer cell antigens
UBB	Release of cancer cell antigens
UBE2T	Release of cancer cell antigens
WDR76	Release of cancer cell antigens
AKT1	NF-kB signaling
AKT2	NF-kB signaling
AKT3	NF-kB signaling
CD14	NF-kB signaling
CD28	NF-kB signaling
CHUK	NF-kB signaling
GAPDH	NF-kB signaling
HPRT1	NF-kB signaling
IKBKB	NF-kB signaling
IKBKG	NF-kB signaling
IL1A	NF-kB signaling
IL1R1	NF-kB signaling
IL1RAP	NF-kB signaling
IRAK1	NF-kB signaling
IRAK2	NF-kB signaling
IRAK3	NF-kB signaling
LBP	NF-kB signaling
LTA	NF-kB signaling
LTBR	NF-kB signaling
LY96	NF-kB signaling
MAP3K1	NF-kB signaling
MYD88	NF-kB signaling
NFKB1	NF-kB signaling
NFKB2	NF-kB signaling
NFKBIA	NF-kB signaling
NFKBIB	NF-kB signaling
NFKBIE	NF-kB signaling
PRKCQ	NF-kB signaling
REL	NF-kB signaling
RELA	NF-kB signaling
RELB	NF-kB signaling
RIPK2	NF-kB signaling
SUMO1	NF-kB signaling
TBP	NF-kB signaling
TLR4	NF-kB signaling
TNF	NF-kB signaling
TNFRSF1A	NF-kB signaling
TNFRSF1B	NF-kB signaling
TRADD	NF-kB signaling
TRAF2	NF-kB signaling
TRAF6	NF-kB signaling
UBB	NF-kB signaling
UBC	NF-kB signaling
DSG2	Adenovirus cell entry receptors
CXADR	Adenovirus cell entry receptors
CD46	Adenovirus cell entry receptors
TNFRSF9	Checkpoint modulators
TNFSF9	Checkpoint modulators
CD276	Checkpoint modulators
VTCN1	Checkpoint modulators
BTLA	Checkpoint modulators
C10orf54	Checkpoint modulators
PVR	Checkpoint modulators
MS4A1	Checkpoint modulators
CD244	Checkpoint modulators
CD27	Checkpoint modulators
CD274	Checkpoint modulators
CD276	Checkpoint modulators
CD28	Checkpoint modulators
TNFRSF8	Checkpoint modulators
CD40	Checkpoint modulators
CD40LG	Checkpoint modulators
CD48	Checkpoint modulators
CD69	Checkpoint modulators
NT5E	Checkpoint modulators
CD80	Checkpoint modulators
CD86	Checkpoint modulators
CEACAM1	Checkpoint modulators
CTLA4	Checkpoint modulators
CXCL12	Checkpoint modulators
CXCR4	Checkpoint modulators
EGFR	Checkpoint modulators
ENTPD1	Checkpoint modulators
EOMES	Checkpoint modulators
FOXO1	Checkpoint modulators
TNFRSF18	Checkpoint modulators
HAVCR2	Checkpoint modulators
HHLA2	Checkpoint modulators
HIF1A	Checkpoint modulators
ICOS	Checkpoint modulators
ICOSLG	Checkpoint modulators
IDO1	Checkpoint modulators
KIR3DL1	Checkpoint modulators
LAG3	Checkpoint modulators
MTOR	Checkpoint modulators
NFATC1	Checkpoint modulators
NT5E	Checkpoint modulators
TNFSF4	Checkpoint modulators
TNFRSF4	Checkpoint modulators
PDCD1	Checkpoint modulators
CD274	Checkpoint modulators
PDCD1LG2	Checkpoint modulators
PIK3CA	Checkpoint modulators
PIK3CD	Checkpoint modulators
PRDM1	Checkpoint modulators
PTEN	Checkpoint modulators
PTPN11	Checkpoint modulators
PVR	Checkpoint modulators
TDO2	Checkpoint modulators
TGFB1	Checkpoint modulators
TGFBR1	Checkpoint modulators
TGFBR2	Checkpoint modulators
TIGIT	Checkpoint modulators
HAVCR2	Checkpoint modulators
TMIGD2	Checkpoint modulators
TNFRSF14	Checkpoint modulators
TNFRSF25	Checkpoint modulators
TNFSF14	Checkpoint modulators
TNFSF4	Checkpoint modulators
VEGFA	Checkpoint modulators
KDR	Checkpoint modulators
VTCN1	Checkpoint modulators
CD30	IFNg and expanded immune gene signatures
IDO1	IFNg and expanded immune gene signatures
CIITA	IFNg and expanded immune gene signatures
CD3E	IFNg and expanded immune gene signatures
CCL5	IFNg and expanded immune gene signatures
GZMK	IFNg and expanded immune gene signatures
CD2	IFNg and expanded immune gene signatures
HLA-DRA	IFNg and expanded immune gene signatures
CXCL13	IFNg and expanded immune gene signatures
IL2RG	IFNg and expanded immune gene signatures
NKG7	IFNg and expanded immune gene signatures
HLA-E	IFNg and expanded immune gene signatures
CXCR6	IFNg and expanded immune gene signatures
LAG3	IFNg and expanded immune gene signatures
TAGAP	IFNg and expanded immune gene signatures
CXCL10	IFNg and expanded immune gene signatures
STAT1	IFNg and expanded immune gene signatures
GZMB	IFNg and expanded immune gene signatures
CXCL9	IFNg and expanded immune gene signatures
HLA-DRA	IFNg and expanded immune gene signatures
IDO1	IFNg and expanded immune gene signatures
IFNG	IFNg and expanded immune gene signatures
STAT1	IFNg and expanded immune gene signatures
CXCL10	IFNg and expanded immune gene signatures
MAGEA1	Tumor associated antigens
MAGEA2	Tumor associated antigens
MAGEA3	Tumor associated antigens
MAGEA4	Tumor associated antigens
GAGE1	Tumor associated antigens
SSX5	Tumor associated antigens
SSX1	Tumor associated antigens
SSX2	Tumor associated antigens
SSX3	Tumor associated antigens
SSX4	Tumor associated antigens
MOK	Tumor associated antigens
MSLN	Tumor associated antigens
MUC16	Tumor associated antigens
WT1	Tumor associated antigens
CTAG1B	Tumor associated antigens
MCAM	Tumor associated antigens
CD70	Tumor associated antigens
MAGED2	Tumor associated antigens
GPC1	Tumor associated antigens
CPSF1	Tumor associated antigens
CPSF3	Tumor associated antigens
ARMC9	Tumor associated antigens
ANXA1	Tumor associated antigens
ANXA2	Tumor associated antigens
ANXA3	Tumor associated antigens
ANXA4	Tumor associated antigens
ANXA5	Tumor associated antigens
ANXA11	Tumor associated antigens
MFI2	Tumor associated antigens
CDK1	Tumor associated antigens
MUC5AC	Tumor associated antigens
MMP2	Tumor associated antigens
FGFBP1	Tumor associated antigens
PXDN	Tumor associated antigens
MUC5B	Tumor associated antigens
FAT1	Tumor associated antigens
MUC13	Tumor associated antigens
TGFBI	Tumor associated antigens
MIF	Tumor associated antigens
HLA-C	Resistance mechanism - associated candidates
B2M	Resistance mechanism - associated candidates
TAP1	Resistance mechanism - associated candidates
TAP2	Resistance mechanism - associated candidates
ICAM1	Resistance mechanism - associated candidates
HLA-E	Resistance mechanism - associated candidates
HLA-G	Resistance mechanism - associated candidates
TGFB1	Resistance mechanism - associated candidates
IL10	Resistance mechanism - associated candidates
NOS2	Resistance mechanism - associated candidates
ELANE	Resistance mechanism - associated candidates
TNFRSF9	Co-stimulatory molecules
ICOSLG	Co-stimulatory molecules
TNFRSF4	Co-stimulatory molecules
TNFRSF18	Co-stimulatory molecules
CD27	Co-stimulatory molecules
CD28	Co-stimulatory molecules
CD274	Checkpoint inhibitors
LAG3	Checkpoint inhibitors
HAVCR2	Checkpoint inhibitors
CTLA4	Checkpoint inhibitors
C10orf54	Checkpoint inhibitors
PVRIG	Checkpoint inhibitors
PVRL2	Checkpoint inhibitors
ILDR2	Checkpoint inhibitors
TIGIT	Checkpoint inhibitors
PVR	Checkpoint inhibitors
TREM1	TREM
TREM2	TREM
TREML1	TREM
TREML2	TREM
TLR9	TLR9 pathway
MYD88	TLR9 pathway
IRAK4	TLR9 pathway
TRAF6	TLR9 pathway
IRAK1	TLR9 pathway
IRF5	TLR9 pathway
IRF7	TLR9 pathway
TLR9	TLR9 pathway extended
MYD88	TLR9 pathway extended
IRAK4	TLR9 pathway extended
TRAF6	TLR9 pathway extended
IRAK1	TLR9 pathway extended
IRF5	TLR9 pathway extended
IRF7	TLR9 pathway extended
TLR9	TLR9 pathway extended
MYD88	TLR9 pathway extended
IRAK4	TLR9 pathway extended
TRAF6	TLR9 pathway extended
IRAK1	TLR9 pathway extended
IRF5	TLR9 pathway extended
IRF7	TLR9 pathway extended
IFNA1	TLR9 pathway extended
IFNB1	TLR9 pathway extended
IL1B	TLR9 pathway extended
TNF	TLR9 pathway extended
CXCL8	TLR9 pathway extended
IL6	TLR9 pathway extended
IL12A	TLR9 pathway extended
CCL5	TLR9 pathway extended
CCL3L3	TLR9 pathway extended
CCL4L1	TLR9 pathway extended
TIGIT	T-cell inflamed gene expression profile
CD27	T-cell inflamed gene expression profile
CD8A	T-cell inflamed gene expression profile
PDCD1LG2	T-cell inflamed gene expression profile
LAG3	T-cell inflamed gene expression profile
CD274	T-cell inflamed gene expression profile
CXCR6	T-cell inflamed gene expression profile
CMKLR1	T-cell inflamed gene expression profile
NKG7	T-cell inflamed gene expression profile
CCL5	T-cell inflamed gene expression profile
PSMB10	T-cell inflamed gene expression profile
IDO1	T-cell inflamed gene expression profile
CXCL9	T-cell inflamed gene expression profile
HLA-DQA1	T-cell inflamed gene expression profile
CD276	T-cell inflamed gene expression profile
STAT1	T-cell inflamed gene expression profile
HLA-DRB1	T-cell inflamed gene expression profile
HLA-E	T-cell inflamed gene expression profile
CXCL9	IFNg gene signature
HLA-DRA	IFNg gene signature
IDO1	IFNg gene signature
IFNG	IFNg gene signature
STAT1	IFNg gene signature
CXCL10	IFNg gene signature
